# Supplementary material
Source: PubMed Central journal article supplement (PMC3975912)
Supplement: NIHMS514996-supplement-Online_Supplemental.pdf [file NIHMS514996-supplement-Online_Supplemental.pdf]

**Table 5. Twelve-month minimally adequate treatment. Mexican National Comorbidity Survey (2001–2002) and Collaborative Psychiatric Epidemiology Surveys (2001–2003).**

| Migration Status                  | Among any service users |    |              |                      |    |              |
|-----------------------------------|-------------------------|----|--------------|----------------------|----|--------------|
|                                   | Light definition        |    |              | Stringent definition |    |              |
|                                   | Frequency               | n  | % (SE)       | Frequency            | n  | % (SE)       |
| No migrant in family              | 153                     | 89 | 59.26 (4.22) | 153                  | 49 | 33.91 (4.76) |
| Members of migrant households     | 174                     | 89 | 48.31 (5.08) | 174                  | 38 | 20.18 (4.01) |
| 1st generation migrants           | 42                      | 12 | 56.02 (12.8) | 42                   | 5  | 18.34 (7.32) |
| 1.5 or 2nd generation migrants    | 25                      | 31 | 70.62 (6.75) | 25                   | 18 | 39.20 (8.78) |
| 3rd or higher generation migrants | 108                     | 70 | 62.53 (5.70) | 108                  | 34 | 30.08 (4.52) |
|                                   | $\chi^2_4$ (p-value)    |    | 6.49 (0.165) |                      |    | 7.70 (0.103) |

Unweighted frequencies; weighted percentages
